# Supplementary material
Source: MDPI journal article supplement (https://www.mdpi.com/2073-4441/12/9/2601)
Supplement: s1 [file s1]

# Spatiotemporal Changes of Antibiotic Resistance and Bacterial Communities in Drinking Water Distribution System in Wrocław, Poland

Agata Siedlecka \*, Mirela Wolf-Baca and Katarzyna Piekarska

Department of Environmental Protection Engineering, Faculty of Environmental Engineering, Wrocław University of Science and Technology, Wyb. Wyspiańskiego 27, 50-370 Wrocław, Poland; mirela.wolf-baca@pwr.edu.pl (M.W.-B.); katarzyna.piekarska@pwr.edu.pl (K.P.)

\* Correspondence: agata.siedlecka@pwr.edu.pl; Tel.: +48-71-320-25-32

**Table S1.** Annealing temperatures, amplicon sizes, and primer sequences used in PCRs [1].

| Gene                        | Ta (°C) | Amplicon Size (bp) | Primer Sequences                                     |
|-----------------------------|---------|--------------------|------------------------------------------------------|
| <i>bla<sub>TEM</sub></i>    | 61      | 247                | GCKGCCAACTTACTTCTGACAACG<br>CTTTATCCGCCTCCATCCAGTCTA |
| <i>bla<sub>SHV</sub></i>    | 61      | 214                | GATGAACGCTTTCCCATGATG<br>CGCTGTTATCGCTCATGGTAA       |
| <i>bla<sub>CTX-M</sub></i>  | 61      | 63                 | GGAGGCGTGACGGCTTTT<br>TTCAGTGCGATCCAGACGAA           |
| <i>bla<sub>KPC</sub></i>    | 60      | 196                | CAGCTCATTCAAGGGCTTTC<br>GGCGGCGTTATCACTGTATT         |
| <i>bla<sub>NDM</sub></i>    | 60      | 189                | GATTGCGACTTATGCCAATG<br>TCGATCCCAACGGTGATATT         |
| <i>bla<sub>OXA</sub></i>    | 64      | 296                | ATTATCTACAGCAGCGCCAGTG<br>TGCATCCACGTCTTTGGTG        |
| <i>bla<sub>OXA-48</sub></i> | 64      | 189                | AGGCACGTATGAGCAAGATG<br>TGGCTTGTTTGACAATACGC         |
| <i>amp<sub>C</sub></i>      | 58      | 189                | CCTCTTGCTCCACATTGCT<br>ACAACGTTTGCTGTGTGACG          |
| <i>mecA</i>                 | 61      | 92                 | CGCAACGTTCAATTTAATTTTGTTAA<br>TGGTCTTTCTGCATTCCTGGA  |
| <i>qnrA</i>                 | 63      | 124                | AGGATTTCTCACGCCAGGATT<br>CCGCTTTCAATGAAACTGCAA       |
| <i>qnrB</i>                 | 62      | 134                | CAGATTTYCGCGGCGCAAG<br>TTCCACAGCTCRCAATTTTC          |
| <i>qnrS</i>                 | 62      | 118                | GACGTGCTAACTTGCGTGAT<br>TGGCATTGTTGGAACTTG           |
| <i>oqxB</i>                 | 64      | 131                | TCCTGATCTCCATTAACGCCCA<br>ACCGGAACCCATCTCGATGC       |
| <i>tetA</i>                 | 58      | 210                | GCTACATCCTGCTTGCCCTTC<br>CATAGATCGCCGTGAAGAGG        |
| <i>tetK</i>                 | 58      | 169                | TCGATAGGAACAGCAGTA<br>CAGCAGATCCTACTCCTT             |
| <i>tetL</i>                 | 58      | 267                | TCGTTAGCGTGCTGTCATTC<br>GTATCCCACCAATGTAGCCG         |
| <i>tetW</i>                 | 60      | 168                | GAGAGCCTGCTATATGCCAGC<br>GGGCGTATCCACAATGTAAAC       |
| <i>sulI</i>                 | 63      | 162                | CGCACC GGAAACATCGCTGCAC<br>TGAAGTCCGCCGCAAGGCTCG     |
| <i>sulIII</i>               | 63      | 190                | TCCGGTGGAGGCCGGTATCTGG                               |

|               |    |     |                                                                                                                                                                                                                                                                                                                                                                                                                                                                                                                                                                       |
|---------------|----|-----|-----------------------------------------------------------------------------------------------------------------------------------------------------------------------------------------------------------------------------------------------------------------------------------------------------------------------------------------------------------------------------------------------------------------------------------------------------------------------------------------------------------------------------------------------------------------------|
| <i>ermA</i>   | 60 | 185 | CGGGAATGCCATCTGCCTTGAG<br>ATGTCTGCATACGGACACGG<br>ACTTCAACTGCCGTTATCGC<br>AAAACCTTACCCGCCATACCA<br>TTTGCGGTGTTTCATTGCTT<br>CTGTGAGGTCGGTTGTGCG<br>TTTGGTCCACCTCGCCA<br>ACACTTATGGCACGGTCTATG<br>GCACACCCAAACCAATGATAC<br>AGGACAACGCTATGCAACGAA<br>CCGGAAGGGCCGAAAT<br>ATTGTCTTCACGGTGTCCGTTA<br>CCGCGATGTCGTCGAACT<br>ATCGCAATAGTTGGCGAAGT<br>CAAGCTTTTGCCCATGAAGC<br>GTGGCAGCTATCGCTTGGAT<br>CCAACGAACGCCCCACAA<br>GATCTGGAGTTCGTTTCGATGAG<br>CGCTTGATTCTGGCTTTG<br>GGCTTCGTGATGCCTGCTT<br>CATTCCTGGCCGTGGTTCT<br>AATTGATGCGGACGGCTTAA<br>TCACCAAACCTGTTTATGGAGTCGTT |
| <i>ermB</i>   | 63 | 139 |                                                                                                                                                                                                                                                                                                                                                                                                                                                                                                                                                                       |
| <i>vanA</i>   | 60 | 65  |                                                                                                                                                                                                                                                                                                                                                                                                                                                                                                                                                                       |
| <i>mcr-1</i>  | 60 | 120 |                                                                                                                                                                                                                                                                                                                                                                                                                                                                                                                                                                       |
| <i>mexA</i>   | 58 | 79  |                                                                                                                                                                                                                                                                                                                                                                                                                                                                                                                                                                       |
| <i>floR</i>   | 62 | 61  |                                                                                                                                                                                                                                                                                                                                                                                                                                                                                                                                                                       |
| <i>qacEΔ1</i> | 63 | 226 |                                                                                                                                                                                                                                                                                                                                                                                                                                                                                                                                                                       |
| <i>qacH</i>   | 60 | 59  |                                                                                                                                                                                                                                                                                                                                                                                                                                                                                                                                                                       |
| <i>tolA</i>   | 60 | 134 |                                                                                                                                                                                                                                                                                                                                                                                                                                                                                                                                                                       |
| <i>intI1</i>  | 63 | 146 |                                                                                                                                                                                                                                                                                                                                                                                                                                                                                                                                                                       |
| <i>tnpA</i>   | 63 | 102 |                                                                                                                                                                                                                                                                                                                                                                                                                                                                                                                                                                       |

**Table S2.** Results of microbiological and physical-chemical parameters of tap water samples collected in the study. NG refers to water treatment plant Na Grobli, MD refers to water treatment plant Mokry Dwór, AML: amoxicillin resistant bacteria, CIP: ciprofloxacin resistant bacteria, CAZ: ceftazidime resistant bacteria, TE: tetracycline resistant bacteria, HPC: heterotrophic plate counts, Cl<sub>2</sub>: chlorine, WTP: water treatment plant.

| Season | Sampling Point | AML   | CIP   | CAZ   | TE    | HPC    | Genes | Distance from WTP | Cl <sub>2</sub> Free | Cl <sub>2</sub> Total | Temp. |
|--------|----------------|-------|-------|-------|-------|--------|-------|-------------------|----------------------|-----------------------|-------|
|        |                | %     |       |       |       | CFU/mL | -     | km                | mg/L                 |                       | °C    |
| summer | NG1S           | 0.38  | 0.11  | 0.26  | 0.35  | 1      | 4     | 0                 | 0.21                 | 0.39                  | 13    |
|        | NG2S           | 0.77  | 0.06  | 0.12  | 16.00 | 31     | 4     | 2.2               | 0.00                 | 0.10                  | 22.5  |
|        | NG3S           | 2.31  | 0.28  | 3.75  | 13.40 | 15     | 8     | 5.3               | 0.00                 | 0.13                  | 21    |
|        | NG4S           | 11.53 | 1.26  | 4.94  | 28.87 | 30     | 5     | 8                 | 0.00                 | 0.17                  | 19    |
|        | MD1S           | 0.50  | 0.00  | 71.25 | 0.17  | 1      | 6     | 0                 | 0.31                 | 0.49                  | 22.5  |
|        | MD2S           | 51.87 | 1.39  | 2.96  | 0.04  | 6      | 7     | 4                 | 0.02                 | 0.22                  | 21    |
|        | MD3S           | 42.92 | 0.88  | 1.89  | 0.08  | 13     | 5     | 9.2               | 0.06                 | 0.19                  | 21.4  |
|        | MD4S           | 40.71 | 2.47  | 10.56 | 1.57  | 14     | 5     | 15                | 0.00                 | 0.14                  | 20.5  |
| winter | NG1W           | 17.60 | 37.00 | 79.40 | 0.00  | 1      | 2     | 0                 | 0.28                 | 0.46                  | 12.5  |
|        | NG2W           | 1.75  | 2.08  | 11.99 | 0.00  | 2      | 6     | 2.2               | 0.16                 | 0.25                  | 13    |
|        | NG3W           | 2.18  | 0.00  | 16.98 | 0.00  | 1      | 4     | 5.3               | 0.00                 | 0.15                  | 18    |
|        | NG4W           | 24.60 | 34.00 | 59.00 | 0.00  | 1      | 6     | 8                 | 0.00                 | 0.19                  | 12.5  |
|        | MD1W           | 0.00  | 4.00  | 68.00 | 0.00  | 1      | 5     | 0                 | 0.28                 | 0.45                  | 2.1   |
|        | MD2W           | 2.60  | 0.00  | 28.00 | 0.00  | 2      | 6     | 4                 | 0.16                 | 0.41                  | 3.7   |
|        | MD3W           | 1.52  | 1.15  | 62.10 | 0.00  | 1      | 4     | 9.2               | 0.17                 | 0.35                  | 6.75  |
|        | MD4W           | 50.14 | 32.00 | 68.47 | 0.34  | 1      | 5     | 15                | 0.04                 | 0.30                  | 6     |

**Table S3.** Results of Spearman and Pearson correlations. Only the statistically significant ( $p < 0.05$ ) correlations are presented. AML: amoxicillin resistant bacteria, CIP: ciprofloxacin resistant bacteria, CAZ: ceftazidime resistant bacteria, TE: tetracycline resistant bacteria, HPC: heterotrophic plate counts, Cl<sub>2</sub>: chlorine, WTP: water treatment plant.

|       | Cl <sub>2</sub> Free | Cl <sub>2</sub> Total | Temp.             | Distance<br>from WTP |
|-------|----------------------|-----------------------|-------------------|----------------------|
| AML   |                      |                       |                   | 0.64<br>p = 0.01     |
| CIP   |                      |                       |                   |                      |
| CAZ   | 0.50<br>p = 0.05     | 0.66<br>p = 0.01      | −0.56<br>p = 0.02 |                      |
| TE    |                      | −0.51<br>p = 0.04     | 0.61<br>p = 0.01  |                      |
| HPC   | −0.60<br>p = 0.01    | −0.71<br>p = 0.00     | 0.58<br>p = 0.02  |                      |
| genes |                      |                       |                   |                      |

## References

1. Siedlecka, A.; Wolf-Baca, M.; Piekarska, K. Seasonal variability of antibiotic resistance and biodiversity of tap water bacteria in Wrocław, Poland. *Environ. Prot. Eng.* **2020**, *46*, 93–109. doi:10.37190/epe200207.
